# Supplementary material
Source: PubMed Central journal article supplement (PMC7032037)
Supplement: NIHMS1558742-supplement-1.pdf [file NIHMS1558742-supplement-1.pdf]

## ONLINE REPOSITORY

**TABLE E1.** Cox proportional hazard model for asthma-related ED visits and hospitalizations, based on different digits of propensity score matching

| Database                                      | Asthma-related ED visits or hospital admissions |       |                           | Asthma-related ED visits |                          | Asthma-related hospital admissions |                          |              |
|-----------------------------------------------|-------------------------------------------------|-------|---------------------------|--------------------------|--------------------------|------------------------------------|--------------------------|--------------|
|                                               | Statin                                          | N     | Event                     | Adjusted HR*             | Events                   | Adjusted HR*                       | Events                   | Adjusted HR* |
| LHID2000+2005+2010 (as presented in Table II) |                                                 |       |                           |                          |                          |                                    |                          |              |
| No                                            | 97,729                                          | 2,818 | 1                         | 1,614                    | 1                        | 1,204                              | 1                        |              |
| Yes                                           | 19,866                                          | 599   | <b>0.81 (0.74, 0.89)†</b> | 322                      | <b>0.86 (0.76, 0.98)</b> | 277                                | <b>0.77 (0.67, 0.88)</b> |              |
| Propensity score matching (digits = 7)        |                                                 |       |                           |                          |                          |                                    |                          |              |
| No                                            | 39,704                                          | 1,450 | 1                         | 763                      | 1                        | 687                                | 1                        |              |
| Yes                                           | 19,856                                          | 597   | <b>0.82 (0.74, 0.90)</b>  | 321                      | <b>0.84 (0.73, 0.95)</b> | 276                                | <b>0.8 (0.70, 0.92)</b>  |              |
| Propensity score matching (digits = 6)        |                                                 |       |                           |                          |                          |                                    |                          |              |
| No                                            | 39,712                                          | 1,439 | 1                         | 761                      | 1                        | 678                                | 1                        |              |
| Yes                                           | 19,859                                          | 597   | <b>0.83 (0.75, 0.91)</b>  | 321                      | <b>0.84 (0.74, 0.96)</b> | 276                                | <b>0.81 (0.70, 0.93)</b> |              |
| Propensity score matching (digits = 5)        |                                                 |       |                           |                          |                          |                                    |                          |              |
| No                                            | 32,711                                          | 1,049 | 1                         | 580                      | 1                        | 469                                | 1                        |              |
| Yes                                           | 19,865                                          | 598   | 0.94 (0.85, 1.04)         | 321                      | 0.91 (0.79, 1.04)        | 277                                | 0.97 (0.84, 1.13)        |              |

ED, Emergency department; HR, hazards ratio.

\*Adjusted for age, sex, Deyo-Charlson index (exclude chronic pulmonary disease) in the 12 mo before the index date, asthma controller medication in the 12 mo before the index date, diagnosis of asthma in the 12 mo before the index date, and health care utilization in the 12 mo before the index date.

†Significant results ( $P < .05$ ) are in bold.**TABLE E2.** Cox proportional hazard model for asthma-related ED visits and hospitalizations, based on different asthma severity

| Database                            | Asthma-related ED visits or hospital admissions |       |                   | Asthma-related ED visits |                   | Asthma-related hospital admissions |                   |              |
|-------------------------------------|-------------------------------------------------|-------|-------------------|--------------------------|-------------------|------------------------------------|-------------------|--------------|
|                                     | Statin                                          | N     | Event             | Adjusted HR*             | Events            | Adjusted HR*                       | Events            | Adjusted HR* |
| Mild-to-moderate asthmatic patients |                                                 |       |                   |                          |                   |                                    |                   |              |
| No                                  | 95,162                                          | 2,671 | Ref               | 1,553                    | Ref               | 1,118                              | Ref               |              |
| Yes                                 | 19,390                                          | 576   | 0.94 (0.85, 1.03) | 317                      | 1.01 (0.89, 1.14) | 259                                | 0.88 (0.77, 1.01) |              |
| Severe asthmatic patients           |                                                 |       |                   |                          |                   |                                    |                   |              |
| No                                  | 2,567                                           | 147   | Ref               | 61                       | Ref               | 86                                 | Ref               |              |
| Yes                                 | 476                                             | 23    | 0.80 (0.51, 1.26) | 5                        | 0.45 (0.18, 1.13) | 18                                 | 1.04 (0.61, 1.75) |              |

ED, Emergency department; HR, hazards ratio.

\*Adjusted for age, sex, Deyo-Charlson index (exclude chronic pulmonary disease) in the 12 mo before the index date, asthma controller medication in the 12 mo before the index date, diagnosis of asthma in the 12 mo before the index date, and health care utilization in the 12 mo before the index date.
